# Supplementary material
Source: Springer Nature journal article supplement (https://www.springermedizin.de/resource/supplementary/12955_2003_70_MOESM1_ESM.pdf/9558500)
Supplement: MOESM1 [file 9558500]

**CONCEPTUAL  
DEFINITION**

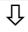

**Source questionnaire**

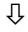

**FORWARD  
TRANSLATION**

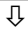

**Forward version A1  
And  
Forward version A2**

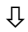

**Forward version B**



**BACKWARD  
TRANSLATION**

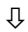

**Forward version C**



**COGNITIVE  
DEBRIEFING**

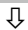

**Forward version D**

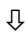

**INTERNATIONAL  
HARMONISATION**

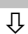

**Final version**

- Definition of the concepts underlying each item of the questionnaire
- Production of two independent translations by two professional translators in the target language conducted in the target country
- Reconciliation meeting between the two "forward" translators and the local project manager to obtain a consensus version.
- Quality control by the MAPI Research Institute
- Translation of forward version B into the source language by one independent translator
- Comparison of the source questionnaire with the "backward" translation by the local team to check the conceptual content of forward version B
- Quality control by the MAPI Research Institute
- Interviews with patients/healthy subjects to test the interpretation of the translation
- Quality control by the MAPI Research Institute
- Comparison of the target language versions with each other and with the original to ensure conceptual equivalence during a meeting with professional translators representing all the countries involved
- Quality control by the MAPI Research Institute
- Final proof-reading
